# Supplementary material for: Can Soil Seed Banks Serve as Genetic Memory? A Study of Three Species with Contrasting Life History Strategies
Source: PubMed Central journal article supplement (PMC3504043; doi:10.1371/journal.pone.0049471), 2012-11-21
Supplement: pone.0049471.s001.pdf [file pone.0049471.s001.pdf]

**Table S1** Allele frequencies at six loci in four populations and four life history stages of *Amaranthus retroflexus* calculated by FSTAT [34]. Loc = locality: B – Besno, Po – Pocedelice, Ps – Psov, V – Vojnice; WSB – winter seed bank, SEED – seedlings, SSB – summer seed bank, FP – fruiting plants. Observed and expected heterozygosities as well as departures from the expected Hardy–Weinberg heterozygosity frequencies were computed using Arlequin 3.1 [39]; – allele absent in sample. Statistically significant departures from the expected Hardy–Weinberg heterozygosity frequencies are indicated in bold.

| Locus    | Loc | Stage | Allele frequency |          |          |          |          |          |          |          | Heterozygosity |       |       |       |
|----------|-----|-------|------------------|----------|----------|----------|----------|----------|----------|----------|----------------|-------|-------|-------|
|          |     |       | Allele 1         | Allele 2 | Allele 3 | Allele 4 | Allele 5 | Allele 6 | Allele 7 | Allele 8 | Obs            | Exp   | P     |       |
| 6-Pgdh-1 | B   | WSB   | 0                | 1        | –        | –        | –        | –        | –        | –        | –              |       |       |       |
|          |     | SEED  | 0                | 1        | –        | –        | –        | –        | –        | –        | –              |       |       |       |
|          |     | SSB   | 0                | 1        | –        | –        | –        | –        | –        | –        | –              |       |       |       |
|          |     | FP    | 0                | 1        | –        | –        | –        | –        | –        | –        | –              |       |       |       |
|          | Po  | WSB   | 0                | 1        | –        | –        | –        | –        | –        | –        | –              |       |       |       |
|          |     | SEED  | 0                | 1        | –        | –        | –        | –        | –        | –        | –              |       |       |       |
|          |     | SSB   | 0                | 1        | –        | –        | –        | –        | –        | –        | –              |       |       |       |
|          |     | FP    | 0                | 1        | –        | –        | –        | –        | –        | –        | –              |       |       |       |
|          | Ps  | WSB   | 0                | 1        | –        | –        | –        | –        | –        | –        | –              |       |       |       |
|          |     | SEED  | 0                | 1        | –        | –        | –        | –        | –        | –        | –              |       |       |       |
|          |     | SSB   | 0                | 1        | –        | –        | –        | –        | –        | –        | –              |       |       |       |
|          |     | FP    | 0                | 1        | –        | –        | –        | –        | –        | –        | –              |       |       |       |
|          | V   | WSB   | 0                | 1        | –        | –        | –        | –        | –        | –        | –              |       |       |       |
|          |     | SEED  | 0.013            | 0.988    | –        | –        | –        | –        | –        | –        | –              | 0.025 | 0.025 | 1.000 |
|          |     | SSB   | 0                | 1        | –        | –        | –        | –        | –        | –        | –              |       |       |       |
|          |     | FP    | 0                | 1        | –        | –        | –        | –        | –        | –        | –              |       |       |       |
| 6-Pgdh-2 | B   | WSB   | 1                | –        | –        | –        | –        | –        | –        | –        |                |       |       |       |
|          |     | SEED  | 1                | –        | –        | –        | –        | –        | –        | –        |                |       |       |       |

|       |    |      |       |       |   |   |   |   |   |   |       |       |                        |
|-------|----|------|-------|-------|---|---|---|---|---|---|-------|-------|------------------------|
|       |    | SSB  | 1     | -     | - | - | - | - | - | - |       |       |                        |
|       |    | FP   | 1     | -     | - | - | - | - | - | - |       |       |                        |
|       | Po | WSB  | 1     | -     | - | - | - | - | - | - |       |       |                        |
|       |    | SEED | 1     | -     | - | - | - | - | - | - |       |       |                        |
|       |    | SSB  | 1     | -     | - | - | - | - | - | - |       |       |                        |
|       |    | FP   | 1     | -     | - | - | - | - | - | - |       |       |                        |
|       | Ps | WSB  | 1     | -     | - | - | - | - | - | - |       |       |                        |
|       |    | SEED | 1     | -     | - | - | - | - | - | - |       |       |                        |
|       |    | SSB  | 1     | -     | - | - | - | - | - | - |       |       |                        |
|       |    | FP   | 1     | -     | - | - | - | - | - | - |       |       |                        |
|       | V  | WSB  | 1     | -     | - | - | - | - | - | - |       |       |                        |
|       |    | SEED | 1     | -     | - | - | - | - | - | - |       |       |                        |
|       |    | SSB  | 1     | -     | - | - | - | - | - | - |       |       |                        |
|       |    | FP   | 1     | -     | - | - | - | - | - | - |       |       |                        |
| Pgm   | B  | WSB  | 0     | 1     | - | - | - | - | - | - |       |       |                        |
|       |    | SEED | 0     | 1     | - | - | - | - | - | - |       |       |                        |
|       |    | SSB  | 0     | 1     | - | - | - | - | - | - |       |       |                        |
|       |    | FP   | 0.038 | 0.963 | - | - | - | - | - | - | 0.025 | 0.073 | <b>0.038</b>           |
|       | Po | WSB  | 0.233 | 0.767 | - | - | - | - | - | - | 0.667 | 0.370 | <b>0.005</b>           |
|       |    | SEED | 0.250 | 0.750 | - | - | - | - | - | - | 0.050 | 0.380 | <b>10<sup>-4</sup></b> |
|       |    | SSB  | 0.500 | 0.500 | - | - | - | - | - | - | 0.143 | 0.538 | 0.118                  |
|       |    | FP   | 0.188 | 0.813 | - | - | - | - | - | - | 0.025 | 0.309 | <b>10<sup>-4</sup></b> |
|       | Ps | WSB  | 0.675 | 0.325 | - | - | - | - | - | - | 0.100 | 0.444 | <b>10<sup>-4</sup></b> |
|       |    | SEED | 0.550 | 0.450 | - | - | - | - | - | - | 0.250 | 0.501 | <b>0.002</b>           |
|       |    | SSB  | 0.600 | 0.400 | - | - | - | - | - | - | 0.150 | 0.486 | <b>10<sup>-4</sup></b> |
|       |    | FP   | 0.350 | 0.650 | - | - | - | - | - | - | 0.200 | 0.461 | <b>10<sup>-4</sup></b> |
|       | V  | WSB  | 0.658 | 0.342 | - | - | - | - | - | - | 0.158 | 0.462 | <b>0.006</b>           |
|       |    | SEED | 0.713 | 0.288 | - | - | - | - | - | - | 0.125 | 0.415 | <b>10<sup>-4</sup></b> |
|       |    | SSB  | 0.838 | 0.163 | - | - | - | - | - | - | 0.125 | 0.276 | <b>0.004</b>           |
|       |    | FP   | 0.688 | 0.313 | - | - | - | - | - | - | 0.175 | 0.435 | <b>10<sup>-4</sup></b> |
| Dia 2 | B  | WSB  | 0.475 | 0.525 | - | - | - | - | - | - | 0.100 | 0.505 | <b>10<sup>-4</sup></b> |

|       |    |      |       |       |       |       |       |       |       |       |       |       |                        |
|-------|----|------|-------|-------|-------|-------|-------|-------|-------|-------|-------|-------|------------------------|
|       |    | SEED | 0.613 | 0.388 | –     | –     | –     | –     | –     | –     | 0.075 | 0.481 | <b>10<sup>-4</sup></b> |
|       |    | SSB  | 0.663 | 0.338 | –     | –     | –     | –     | –     | –     | 0.025 | 0.453 | <b>10<sup>-4</sup></b> |
|       |    | FP   | 0.475 | 0.525 | –     | –     | –     | –     | –     | –     | 0.100 | 0.505 | <b>10<sup>-4</sup></b> |
|       | Po | WSB  | 0.733 | 0.267 | –     | –     | –     | –     | –     | –     | 0.267 | 0.405 | 0.226                  |
|       |    | SEED | 0.663 | 0.338 | –     | –     | –     | –     | –     | –     | 0.175 | 0.453 | <b>10<sup>-4</sup></b> |
|       |    | SSB  | 0.786 | 0.214 | –     | –     | –     | –     | –     | –     | 0.143 | 0.363 | 0.231                  |
|       |    | FP   | 0.850 | 0.150 | –     | –     | –     | –     | –     | –     | 0.050 | 0.258 | <b>10<sup>-4</sup></b> |
|       | Ps | WSB  | 0.750 | 0.250 | –     | –     | –     | –     | –     | –     | 0.100 | 0.380 | <b>10<sup>-4</sup></b> |
|       |    | SEED | 0.613 | 0.388 | –     | –     | –     | –     | –     | –     | 0.125 | 0.481 | <b>10<sup>-4</sup></b> |
|       |    | SSB  | 0.625 | 0.375 | –     | –     | –     | –     | –     | –     | 0.250 | 0.475 | <b>0.006</b>           |
|       |    | FP   | 0.638 | 0.363 | –     | –     | –     | –     | –     | –     | 0.225 | 0.468 | <b>0.002</b>           |
|       | V  | WSB  | 0.658 | 0.342 | –     | –     | –     | –     | –     | –     | 0.263 | 0.462 | 0.116                  |
|       |    | SEED | 0.663 | 0.338 | –     | –     | –     | –     | –     | –     | 0.125 | 0.453 | <b>10<sup>-4</sup></b> |
|       |    | SSB  | 0.750 | 0.250 | –     | –     | –     | –     | –     | –     | 0.200 | 0.380 | <b>0.005</b>           |
|       |    | FP   | 0.775 | 0.225 | –     | –     | –     | –     | –     | –     | 0.150 | 0.353 | <b>0.001</b>           |
| Est 1 | B  | WSB  | 0     | 0     | 0     | 0.050 | 0.150 | 0     | 0.725 | 0.075 | 0.100 | 0.449 | <b>10<sup>-4</sup></b> |
|       |    | SEED | 0     | 0     | 0     | 0     | 0.038 | 0.075 | 0.875 | 0.013 | 0.025 | 0.230 | <b>10<sup>-4</sup></b> |
|       |    | SSB  | 0     | 0     | 0.025 | 0.125 | 0     | 0.750 | 0     | 0.100 | 0.250 | 0.416 | <b>10<sup>-4</sup></b> |
|       |    | FP   | 0     | 0     | 0     | 0.188 | 0.250 | 0     | 0.563 | 0     | 0.275 | 0.593 | <b>10<sup>-4</sup></b> |
|       | Po | WSB  | 0.067 | 0     | 0     | 0.200 | 0.133 | 0.067 | 0.533 | 0     | 0.133 | 0.671 | <b>10<sup>-4</sup></b> |
|       |    | SEED | 0.075 | 0     | 0.238 | 0.113 | 0.250 | 0     | 0.300 | 0.025 | 0.550 | 0.782 | <b>10<sup>-4</sup></b> |
|       |    | SSB  | 0.143 | 0     | 0.286 | 0.214 | 0.071 | 0.286 | 0     | 0     | 0.571 | 0.824 | <b>0.033</b>           |
|       |    | FP   | 0     | 0     | 0     | 0.150 | 0.475 | 0.300 | 0.013 | 0.063 | 0.500 | 0.666 | <b>10<sup>-4</sup></b> |
|       | Ps | WSB  | 0     | 0     | 0.050 | 0.363 | 0.400 | 0.100 | 0.050 | 0.038 | 0.325 | 0.701 | <b>10<sup>-4</sup></b> |
|       |    | SEED | 0     | 0.013 | 0.063 | 0.338 | 0.463 | 0.063 | 0     | 0.063 | 0.475 | 0.669 | <b>10<sup>-4</sup></b> |
|       |    | SSB  | 0.125 | 0     | 0.088 | 0.125 | 0.613 | 0.025 | 0     | 0.025 | 0.300 | 0.592 | <b>10<sup>-4</sup></b> |
|       |    | FP   | 0     | 0     | 0.050 | 0.513 | 0.250 | 0     | 0.075 | 0.113 | 0.600 | 0.662 | <b>0.009</b>           |
|       | V  | WSB  | 0.105 | 0     | 0.579 | 0.105 | 0.184 | 0     | 0     | 0.026 | 0.421 | 0.624 | <b>10<sup>-4</sup></b> |
|       |    | SEED | 0.013 | 0     | 0.450 | 0.063 | 0.438 | 0     | 0.025 | 0.013 | 0.575 | 0.609 | <b>10<sup>-4</sup></b> |
|       |    | SSB  | 0.088 | 0     | 0.600 | 0.088 | 0.213 | 0     | 0     | 0.013 | 0.375 | 0.587 | <b>10<sup>-4</sup></b> |
|       |    | FP   | 0     | 0     | 0.013 | 0.025 | 0.925 | 0     | 0.013 | 0.025 | 0.075 | 0.145 | <b>0.003</b>           |

|     |    |      |   |   |   |   |   |   |   |   |  |  |  |
|-----|----|------|---|---|---|---|---|---|---|---|--|--|--|
| Adh | B  | WSB  | 1 | - | - | - | - | - | - | - |  |  |  |
|     |    | SEED | 1 | - | - | - | - | - | - | - |  |  |  |
|     |    | SSB  | 1 | - | - | - | - | - | - | - |  |  |  |
|     |    | FP   | 1 | - | - | - | - | - | - | - |  |  |  |
|     | Po | WSB  | 1 | - | - | - | - | - | - | - |  |  |  |
|     |    | SEED | 1 | - | - | - | - | - | - | - |  |  |  |
|     |    | SSB  | 1 | - | - | - | - | - | - | - |  |  |  |
|     |    | FP   | 1 | - | - | - | - | - | - | - |  |  |  |
|     | Ps | WSB  | 1 | - | - | - | - | - | - | - |  |  |  |
|     |    | SEED | 1 | - | - | - | - | - | - | - |  |  |  |
|     |    | SSB  | 1 | - | - | - | - | - | - | - |  |  |  |
|     |    | FP   | 1 | - | - | - | - | - | - | - |  |  |  |
|     | V  | WSB  | 1 | - | - | - | - | - | - | - |  |  |  |
|     |    | SEED | 1 | - | - | - | - | - | - | - |  |  |  |
|     |    | SSB  | 1 | - | - | - | - | - | - | - |  |  |  |
|     |    | FP   | 1 | - | - | - | - | - | - | - |  |  |  |
