# Supplementary material for: Can Soil Seed Banks Serve as Genetic Memory? A Study of Three Species with Contrasting Life History Strategies
Source: PubMed Central journal article supplement (PMC3504043; doi:10.1371/journal.pone.0049471), 2012-11-21
Supplement: pone.0049471.s002.pdf [file pone.0049471.s002.pdf]

**Table S2** Allele frequencies at eight polymorphic loci in four populations and life history stages of *Carduus acanthoides* calculated by FSTAT [34]. Loc = locality: B – Bustehrad, D – Dobris, O – Orech, V – Velen; WSB – winter seed bank, ROS – rosette, SSB – summer seed bank, FP – fruiting plants. Observed and expected heterozygosities as well as departures from the expected Hardy–Weinberg heterozygosity frequencies performed with Arlequin 3.1 [39]; – allele absent in sample. Statistically significant departures from the expected Hardy–Weinberg heterozygosity frequencies are indicated in bold.

| Locus | Loc | Stage | Allele frequency |          |          |          |          | Heterozygosity |       |              |
|-------|-----|-------|------------------|----------|----------|----------|----------|----------------|-------|--------------|
|       |     |       | Allele 1         | Allele 2 | Allele 3 | Allele 4 | Allele 5 | Obs            | Exp   | P            |
| Lap   | B   | WSB   | 0.113            | 0.625    | 0.263    | –        | –        | 0.550          | 0.531 | 0.218        |
|       |     | ROS   | 0.063            | 0.650    | 0.288    | –        | –        | 0.550          | 0.497 | 0.077        |
|       |     | SSB   | 0.175            | 0.563    | 0.263    | –        | –        | 0.650          | 0.591 | 0.867        |
|       |     | FP    | 0.075            | 0.638    | 0.288    | –        | –        | 0.400          | 0.512 | <b>0.042</b> |
|       | D   | WSB   | 0.294            | 0.606    | 0.100    | –        | –        | 0.550          | 0.540 | <b>0.045</b> |
|       |     | RO    | 0.263            | 0.563    | 0.175    | –        | –        | 0.600          | 0.591 | 0.280        |
|       |     | SSB   | 0.225            | 0.650    | 0.125    | –        | –        | 0.625          | 0.518 | 0.352        |
|       |     | FP    | 0.275            | 0.588    | 0.138    | –        | –        | 0.450          | 0.567 | <b>0.019</b> |
|       | O   | WSB   | 0.014            | 0.740    | 0.247    | –        | –        | 0.384          | 0.395 | <b>0.013</b> |
|       |     | RO    | 0                | 0.688    | 0.313    | –        | –        | 0.425          | 0.435 | 1.000        |
|       |     | SSB   | 0                | 0.750    | 0.250    | –        | –        | 0.500          | 0.409 | 1.000        |
|       |     | FP    | 0                | 0.713    | 0.288    | –        | –        | 0.475          | 0.415 | 0.454        |
|       | V   | WSB   | 0.013            | 0.863    | 0.125    | –        | –        | 0.200          | 0.242 | 0.169        |
|       |     | RO    | 0.013            | 0.900    | 0.088    | –        | –        | 0.100          | 0.184 | <b>0.032</b> |
|       |     | SSB   | 0.013            | 0.888    | 0.100    | –        | –        | 0.225          | 0.205 | 1.000        |
|       |     | FP    | 0.013            | 0.888    | 0.100    | –        | –        | 0.175          | 0.205 | 0.394        |
| SHDH  | B   | WSB   | 0.013            | 0.519    | 0.263    | 0.206    | –        | 0.388          | 0.623 | <b>0.000</b> |
|       |     | ROS   | 0                | 0.413    | 0.400    | 0.188    | –        | 0.475          | 0.643 | <b>0.000</b> |
|       |     | SSB   | 0                | 0.795    | 0.103    | 0.103    | –        | 0.205          | 0.352 | <b>0.005</b> |
|       |     | FP    | 0                | 0.563    | 0.225    | 0.213    | –        | 0.475          | 0.595 | <b>0.000</b> |
|       | D   | WSB   | 0                | 0.631    | 0.169    | 0.200    | –        | 0.188          | 0.536 | <b>0.000</b> |
|       |     | RO    | 0                | 0.400    | 0.363    | 0.238    | –        | 0.300          | 0.660 | <b>0.000</b> |
|       |     | SSB   | 0                | 0.575    | 0.325    | 0.100    | –        | 0.150          | 0.561 | <b>0.000</b> |
|       |     | FP    | 0                | 0.450    | 0.300    | 0.250    | –        | 0.450          | 0.653 | <b>0.000</b> |
|       | O   | WSB   | 0.014            | 0.397    | 0.185    | 0.404    | –        | 0.466          | 0.649 | <b>0.000</b> |
|       |     | RO    | 0                | 0.463    | 0.025    | 0.513    | –        | 0.225          | 0.529 | <b>0.000</b> |
|       |     | SSB   | 0                | 0.833    | 0.167    | 0        | –        | 0.000          | 0.303 | 0.091        |
|       |     | FP    | 0.013            | 0.425    | 0.100    | 0.463    | –        | 0.375          | 0.603 | <b>0.000</b> |
|       | V   | WSB   | 0.044            | 0.700    | 0.044    | 0.213    | –        | 0.288          | 0.464 | <b>0.000</b> |
|       |     | RO    | 0                | 0.763    | 0        | 0.238    | –        | 0.225          | 0.367 | <b>0.023</b> |
|       |     | SSB   | 0                | 0.850    | 0.025    | 0.125    | –        | 0.250          | 0.265 | 0.619        |
|       |     | FP    | 0.013            | 0.750    | 0        | 0.238    | –        | 0.275          | 0.386 | <b>0.040</b> |
| ADH   | B   | WSB   | 0.181            | 0.819    | 0        | –        | –        | 0.313          | 0.299 | 1.000        |

|          |   |     |       |       |       |   |   |       |       |              |
|----------|---|-----|-------|-------|-------|---|---|-------|-------|--------------|
|          |   | ROS | 0.113 | 0.888 | 0     | – | – | 0.175 | 0.202 | 0.395        |
|          |   | SSB | 0.225 | 0.763 | 0.013 | – | – | 0.325 | 0.372 | 0.519        |
|          |   | FP  | 0.250 | 0.750 | 0     | – | – | 0.350 | 0.380 | 0.678        |
|          | D | WSB | 0.081 | 0.919 | 0     | – | – | 0.113 | 0.150 | 0.073        |
|          |   | RO  | 0.088 | 0.913 | 0     | – | – | 0.175 | 0.162 | 1.000        |
|          |   | SSB | 0.100 | 0.900 | 0     | – | – | 0.200 | 0.182 | 1.000        |
|          |   | FP  | 0.100 | 0.900 | 0     | – | – | 0.200 | 0.182 | 1.000        |
|          | O | WSB | 0.199 | 0.795 | 0.007 | – | – | 0.329 | 0.332 | 1.000        |
|          |   | RO  | 0.163 | 0.825 | 0.013 | – | – | 0.200 | 0.297 | 0.073        |
|          |   | SSB | 0.167 | 0.833 | 0     | – | – | 0.000 | 0.303 | 0.090        |
|          |   | FP  | 0.150 | 0.850 | 0     | – | – | 0.300 | 0.258 | 0.567        |
|          | V | WSB | 0.194 | 0.794 | 0.013 | – | – | 0.313 | 0.334 | 0.669        |
|          |   | RO  | 0.188 | 0.788 | 0.025 | – | – | 0.375 | 0.348 | 1.000        |
|          |   | SSB | 0.275 | 0.725 | 0     | – | – | 0.500 | 0.404 | 0.228        |
|          |   | FP  | 0.213 | 0.775 | 0.013 | – | – | 0.250 | 0.359 | 0.111        |
| 6-PGDH-1 | B | WSB | 0.788 | 0.213 | –     | – | – | 0.375 | 0.337 | 0.500        |
|          |   | ROS | 0.813 | 0.188 | –     | – | – | 0.275 | 0.309 | 0.598        |
|          |   | SSB | 0.700 | 0.300 | –     | – | – | 0.300 | 0.425 | 0.125        |
|          |   | FP  | 0.863 | 0.138 | –     | – | – | 0.275 | 0.240 | 1.000        |
|          | D | WSB | 0.556 | 0.444 | –     | – | – | 0.463 | 0.497 | 0.650        |
|          |   | RO  | 0.325 | 0.675 | –     | – | – | 0.450 | 0.444 | 1.000        |
|          |   | SSB | 0.463 | 0.538 | –     | – | – | 0.425 | 0.503 | 0.354        |
|          |   | FP  | 0.538 | 0.463 | –     | – | – | 0.475 | 0.503 | 0.758        |
|          | O | WSB | 0.589 | 0.411 | –     | – | – | 0.466 | 0.487 | 0.810        |
|          |   | RO  | 0.588 | 0.413 | –     | – | – | 0.375 | 0.491 | 0.191        |
|          |   | SSB | 0.500 | 0.500 | –     | – | – | 0.667 | 0.545 | 1.000        |
|          |   | FP  | 0.588 | 0.413 | –     | – | – | 0.525 | 0.491 | 0.748        |
|          | V | WSB | 0.638 | 0.363 | –     | – | – | 0.450 | 0.465 | 0.812        |
|          |   | RO  | 0.588 | 0.413 | –     | – | – | 0.375 | 0.491 | 0.191        |
|          |   | SSB | 0.675 | 0.325 | –     | – | – | 0.350 | 0.444 | 0.275        |
|          |   | FP  | 0.650 | 0.350 | –     | – | – | 0.450 | 0.461 | 1.000        |
| 6-PGDH-1 | B | WSB | 0.763 | 0.156 | 0.081 | – | – | 0.325 | 0.390 | <b>0.006</b> |
|          |   | ROS | 0.700 | 0.175 | 0.125 | – | – | 0.475 | 0.470 | 0.623        |
|          |   | SSB | 0.763 | 0.138 | 0.100 | – | – | 0.450 | 0.395 | 1.000        |
|          |   | FP  | 0.750 | 0.175 | 0.075 | – | – | 0.375 | 0.406 | 0.768        |
|          | D | WSB | 0.913 | 0.031 | 0.056 | – | – | 0.175 | 0.164 | 1.000        |
|          |   | RO  | 0.925 | 0.038 | 0.038 | – | – | 0.150 | 0.143 | 1.000        |
|          |   | SSB | 0.913 | 0.013 | 0.075 | – | – | 0.175 | 0.164 | 1.000        |
|          |   | FP  | 0.938 | 0.038 | 0.025 | – | – | 0.100 | 0.121 | 0.122        |
|          | O | WSB | 0.952 | 0.048 | 0     | – | – | 0.068 | 0.092 | 0.140        |
|          |   | RO  | 0.950 | 0.050 | 0     | – | – | 0.100 | 0.096 | 1.000        |
|          |   | SSB | 1.000 | 0     | 0     | – | – |       |       |              |
|          |   | FP  | 0.900 | 0.100 | 0     | – | – | 0.200 | 0.182 | 1.000        |
|          | V | WSB | 0.744 | 0.044 | 0.213 | – | – | 0.375 | 0.402 | 0.426        |
|          |   | RO  | 0.763 | 0.013 | 0.225 | – | – | 0.450 | 0.372 | <b>0.045</b> |
|          |   | SSB | 0.838 | 0.013 | 0.150 | – | – | 0.225 | 0.279 | 0.316        |
|          |   | FP  | 0.763 | 0.013 | 0.225 | – | – | 0.300 | 0.372 | 0.089        |
| AAT-1    | B | WSB | 0.013 | 0.025 | 0.962 | – | – | 0.051 | 0.074 | <b>0.045</b> |

|       |   |     |       |       |       |       |       |       |       |              |
|-------|---|-----|-------|-------|-------|-------|-------|-------|-------|--------------|
|       |   | ROS | 0.013 | 0.038 | 0.950 | –     | –     | 0.100 | 0.097 | 1.000        |
|       |   | SSB | 0     | 0.013 | 0.987 | –     | –     | 0.026 | 0.026 | 1.000        |
|       |   | FP  | 0.063 | 0.038 | 0.900 | –     | –     | 0.050 | 0.187 | 0.000        |
|       | D | WSB | 0.006 | 0.032 | 0.962 | –     | –     | 0.051 | 0.074 | 0.093        |
|       |   | RO  | 0.038 | 0.050 | 0.913 | –     | –     | 0.175 | 0.166 | 1.000        |
|       |   | SSB | 0.013 | 0.025 | 0.963 | –     | –     | 0.075 | 0.074 | 1.000        |
|       |   | FP  | 0.100 | 0.075 | 0.825 | –     | –     | 0.300 | 0.308 | 0.311        |
|       | O | WSB | 0     | 0     | 1.000 | –     | –     |       |       |              |
|       |   | RO  | 0     | 0     | 1.000 | –     | –     |       |       |              |
|       |   | SSB | 0     | 0     | 1.000 | –     | –     |       |       |              |
|       |   | FP  | 0.013 | 0     | 0.988 | –     | –     | 0.025 | 0.250 | 1.000        |
|       | V | WSB | 0.006 | 0.013 | 0.981 | –     | –     | 0.013 | 0.037 | <b>0.006</b> |
|       |   | RO  | 0     | 0     | 1.000 | –     | –     |       |       |              |
|       |   | SSB | 0.013 | 0     | 0.988 | –     | –     | 0.025 | 0.025 | 1.000        |
|       |   | FP  | 0     | 0.013 | 0.988 | –     | –     | 0.025 | 0.025 | 1.000        |
| AAT-2 | B | WSB | 0.669 | 0.331 | –     | –     | –     | 0.438 | 0.446 | 1.000        |
|       |   | ROS | 0.588 | 0.413 | –     | –     | –     | 0.425 | 0.491 | 0.515        |
|       |   | SSB | 0.613 | 0.388 | –     | –     | –     | 0.475 | 0.481 | 1.000        |
|       |   | FP  | 0.488 | 0.513 | –     | –     | –     | 0.625 | 0.506 | 0.204        |
|       | D | WSB | 0.650 | 0.350 | –     | –     | –     | 0.475 | 0.458 | 0.808        |
|       |   | RO  | 0.513 | 0.488 | –     | –     | –     | 0.425 | 0.506 | 0.355        |
|       |   | SSB | 0.663 | 0.338 | –     | –     | –     | 0.525 | 0.453 | 0.477        |
|       |   | FP  | 0.563 | 0.438 | –     | –     | –     | 0.425 | 0.498 | 0.519        |
|       | O | WSB | 0.507 | 0.493 | –     | –     | –     | 0.521 | 0.503 | 0.816        |
|       |   | RO  | 0.575 | 0.425 | –     | –     | –     | 0.300 | 0.495 | <b>0.021</b> |
|       |   | SSB | 0.917 | 0.083 | –     | –     | –     | 0.167 | 0.167 | 1.000        |
|       |   | FP  | 0.600 | 0.400 | –     | –     | –     | 0.650 | 0.486 | <b>0.047</b> |
|       | V | WSB | 0.656 | 0.344 | –     | –     | –     | 0.438 | 0.454 | 0.806        |
|       |   | RO  | 0.475 | 0.525 | –     | –     | –     | 0.550 | 0.505 | 0.752        |
|       |   | SSB | 0.550 | 0.450 | –     | –     | –     | 0.450 | 0.501 | 0.537        |
|       |   | FP  | 0.613 | 0.388 | –     | –     | –     | 0.575 | 0.481 | 0.317        |
| DIA-1 | B | WSB | 0     | 0.238 | 0     | 0.638 | 0.125 | 0.450 | 0.525 | 0.259        |
|       |   | ROS | 0     | 0.300 | 0.013 | 0.525 | 0.163 | 0.550 | 0.616 | 0.594        |
|       |   | SSB | 0     | 0.250 | 0     | 0.613 | 0.138 | 0.450 | 0.550 | 0.352        |
|       |   | FP  | 0.050 | 0.263 | 0.025 | 0.525 | 0.138 | 0.725 | 0.641 | 0.058        |
|       | D | WSB | 0.013 | 0.494 | 0     | 0.319 | 0.175 | 0.663 | 0.628 | 0.099        |
|       |   | RO  | 0.100 | 0.550 | 0     | 0.288 | 0.063 | 0.800 | 0.609 | 0.010        |
|       |   | SSB | 0     | 0.513 | 0     | 0.363 | 0.125 | 0.650 | 0.598 | 0.594        |
|       |   | FP  | 0.025 | 0.575 | 0     | 0.300 | 0.100 | 0.500 | 0.576 | 0.263        |
|       | O | WSB | 0     | 0.685 | 0     | 0.260 | 0.055 | 0.438 | 0.463 | 0.880        |
|       |   | RO  | 0.038 | 0.588 | 0     | 0.225 | 0.150 | 0.575 | 0.588 | 0.668        |
|       |   | SSB | 0     | 0.667 | 0     | 0.333 | 0     | 0.667 | 0.485 | 1.000        |
|       |   | FP  | 0.063 | 0.575 | 0     | 0.250 | 0.113 | 0.650 | 0.598 | 0.085        |
|       | V | WSB | 0.013 | 0.356 | 0.013 | 0.581 | 0.038 | 0.538 | 0.537 | 0.604        |
|       |   | RO  | 0     | 0.413 | 0     | 0.563 | 0.025 | 0.425 | 0.519 | 0.293        |
|       |   | SSB | 0     | 0.413 | 0     | 0.563 | 0.025 | 0.700 | 0.519 | <b>0.037</b> |
|       |   | FP  | 0     | 0.450 | 0     | 0.513 | 0.038 | 0.675 | 0.540 | 0.094        |
