# Supplementary material for: Can Soil Seed Banks Serve as Genetic Memory? A Study of Three Species with Contrasting Life History Strategies
Source: PubMed Central journal article supplement (PMC3504043; doi:10.1371/journal.pone.0049471), 2012-11-21
Supplement: pone.0049471.s003.pdf [file pone.0049471.s003.pdf]

**Table S3** Allele frequencies at eight loci in four populations and five life history stages of *Pastinaca sativa* calculated by FSTAT [34]. Loc = locality: DB – Dobre Pole, O – Ostopovice, S – Sedlec, Z – Zidneves; WSB – winter seed bank, SEED – seedlings, RO – rosettes, SSB – summer seed bank, FP – fruiting plants. Observed and expected heterozygosities as well as departures from the expected Hardy–Weinberg heterozygosity frequencies performed with Arlequin 3.1 [39]; – allele absent in sample. Statistically significant departures from the expected Hardy–Weinberg heterozygosity frequencies are indicated in bold.

| Locus | Loc | Stage | Allele frequency |          |          |          |          |          |          | Heterozygosity |       |                        |
|-------|-----|-------|------------------|----------|----------|----------|----------|----------|----------|----------------|-------|------------------------|
|       |     |       | Allele 1         | Allele 2 | Allele 3 | Allele 4 | Allele 5 | Allele 6 | Allele 7 | Obs            | Exp   | P                      |
| Lap   | DP  | WSB   | 0                | 0.038    | 0.088    | 0.688    | 0.013    | 0.175    | 0        | 0.375          | 0.494 | 0.052                  |
|       |     | SEED  | 0.050            | 0.038    | 0.175    | 0.588    | 0.038    | 0.113    | 0        | 0.625          | 0.614 | 0.921                  |
|       |     | RO    | 0.013            | 0.063    | 0.163    | 0.625    | 0.013    | 0.125    | 0        | 0.400          | 0.570 | <b>0.003</b>           |
|       |     | SSB   | 0                | 0        | 0.067    | 0.767    | 0        | 0.167    | 0        | 0.333          | 0.393 | 0.078                  |
|       |     | FP    | 0.025            | 0.025    | 0.075    | 0.788    | 0        | 0.088    | 0        | 0.375          | 0.370 | 0.632                  |
|       | O   | WSB   | 0                | 0.038    | 0.350    | 0.500    | 0        | 0.113    | 0        | 0.450          | 0.621 | <b>0.014</b>           |
|       |     | SEED  | 0.013            | 0        | 0.250    | 0.600    | 0        | 0.138    | 0        | 0.500          | 0.566 | 0.259                  |
|       |     | RO    | 0                | 0.015    | 0.258    | 0.636    | 0        | 0.091    | 0        | 0.515          | 0.528 | 0.883                  |
|       |     | SSB   | 0                | 0        | 0.400    | 0.600    | 0        | 0        | 0        | 0.000          | 0.533 | <b>0.047</b>           |
|       |     | FP    | 0                | 0        | 0.138    | 0.713    | 0        | 0.150    | 0        | 0.400          | 0.457 | <b>0.001</b>           |
|       | Z   | WSB   | 0.063            | 0.013    | 0.338    | 0.563    | 0        | 0.025    | 0        | 0.425          | 0.572 | <b>0.040</b>           |
|       |     | SEED  | 0.075            | 0        | 0.288    | 0.638    | 0        | 0        | 0        | 0.425          | 0.512 | 0.443                  |
|       |     | RO    | 0.088            | 0        | 0.350    | 0.563    | 0        | 0        | 0        | 0.225          | 0.560 | <b>10<sup>-4</sup></b> |
|       |     | SSB   | 0.065            | 0        | 0.217    | 0.696    | 0        | 0.022    | 0        | 0.174          | 0.474 | <b>10<sup>-4</sup></b> |
|       |     | FP    | 0.088            | 0.025    | 0.450    | 0.438    | 0        | 0        | 0        | 0.300          | 0.605 | <b>10<sup>-4</sup></b> |
|       | S   | WSB   | 0.019            | 0.019    | 0.058    | 0.692    | 0        | 0.173    | 0.038    | 0.462          | 0.495 | 0.085                  |
|       |     | SEED  | 0                | 0.063    | 0.125    | 0.613    | 0        | 0.175    | 0.025    | 0.600          | 0.581 | 0.859                  |

|         |    |      |       |       |       |       |       |       |       |       |       |                        |
|---------|----|------|-------|-------|-------|-------|-------|-------|-------|-------|-------|------------------------|
|         |    | RO   | 0     | 0.075 | 0.250 | 0.425 | 0     | 0.238 | 0.013 | 0.425 | 0.703 | <b>10<sup>-4</sup></b> |
|         |    | SSB  | 0     | 0     | 0     | 0.625 | 0     | 0.375 | 0     | 0.750 | 0.536 | 1.000                  |
|         |    | FP   | 0     | 0.063 | 0.113 | 0.550 | 0     | 0.250 | 0.025 | 0.500 | 0.626 | 0.229                  |
| Shdh    | DP | WSB  | 0.013 | 0.175 | 0     | 0.813 | 0     | –     | –     | 0.275 | 0.313 | 0.653                  |
|         |    | SEED | 0.025 | 0.200 | 0     | 0.775 | 0     | –     | –     | 0.350 | 0.363 | 0.780                  |
|         |    | RO   | 0.013 | 0.244 | 0     | 0.744 | 0     | –     | –     | 0.436 | 0.393 | 0.220                  |
|         |    | SSB  | 0     | 0.167 | 0     | 0.833 | 0     | –     | –     | 0.333 | 0.287 | 1.000                  |
|         |    | FP   | 0     | 0.175 | 0     | 0.813 | 0.013 | –     | –     | 0.325 | 0.313 | 1.000                  |
|         | O  | WSB  | 0.025 | 0.213 | 0.013 | 0.750 | 0     | –     | –     | 0.375 | 0.397 | 0.618                  |
|         |    | SEED | 0.013 | 0.263 | 0     | 0.713 | 0.013 | –     | –     | 0.450 | 0.428 | 0.526                  |
|         |    | RO   | 0.030 | 0.288 | 0     | 0.636 | 0.045 | –     | –     | 0.576 | 0.517 | 0.061                  |
|         |    | SSB  | 0     | 0.500 | 0     | 0.500 | 0     | –     | –     | 0.600 | 0.556 | 1.000                  |
|         |    | FP   | 0.038 | 0.325 | 0     | 0.638 | 0     | –     | –     | 0.475 | 0.493 | 0.068                  |
|         | Z  | WSB  | 0.013 | 0.275 | 0     | 0.713 | 0     | –     | –     | 0.375 | 0.422 | 0.599                  |
|         |    | SEED | 0.013 | 0.450 | 0     | 0.538 | 0     | –     | –     | 0.300 | 0.515 | <b>0.006</b>           |
|         |    | RO   | 0     | 0.450 | 0     | 0.550 | 0     | –     | –     | 0.400 | 0.501 | 0.217                  |
|         |    | SSB  | 0     | 0.500 | 0     | 0.500 | 0     | –     | –     | 0.478 | 0.511 | 1.000                  |
|         |    | FP   | 0.013 | 0.438 | 0     | 0.550 | 0     | –     | –     | 0.475 | 0.512 | 0.620                  |
|         | S  | WSB  | 0.019 | 0.462 | 0     | 0.519 | 0     | –     | –     | 0.462 | 0.527 | 0.546                  |
|         |    | SEED | 0.050 | 0.425 | 0.013 | 0.513 | 0     | –     | –     | 0.450 | 0.561 | 0.333                  |
|         |    | RO   | 0     | 0.450 | 0.025 | 0.513 | 0.013 | –     | –     | 0.550 | 0.541 | 0.642                  |
|         |    | SSB  | 0     | 0.375 | 0     | 0.625 | 0     | –     | –     | 0.250 | 0.536 | 0.429                  |
|         |    | FP   | 0.013 | 0.438 | 0.025 | 0.525 | 0     | –     | –     | 0.625 | 0.539 | 0.636                  |
| Nadh–Dh | DP | WSB  | 0.013 | 0.988 | –     | –     | –     | –     | –     | 0.025 | 0.025 | 1.000                  |
|         |    | SEED | 0.025 | 0.975 | –     | –     | –     | –     | –     | 0.050 | 0.049 | 1.000                  |
|         |    | RO   | 0.050 | 0.950 | –     | –     | –     | –     | –     | 0.100 | 0.096 | 1.000                  |
|         |    | SSB  | 0.033 | 0.967 | –     | –     | –     | –     | –     | 0.067 | 0.067 | 1.000                  |
|         |    | FP   | 0.063 | 0.938 | –     | –     | –     | –     | –     | 0.075 | 0.119 | 0.124                  |
|         | O  | WSB  | 0.150 | 0.850 | –     | –     | –     | –     | –     | 0.100 | 0.258 | <b>0.001</b>           |
|         |    | SEED | 0.038 | 0.963 | –     | –     | –     | –     | –     | 0.075 | 0.073 | 1.000                  |

|          |    |      |       |       |   |   |   |   |   |       |       |                        |
|----------|----|------|-------|-------|---|---|---|---|---|-------|-------|------------------------|
|          |    | RO   | 0.045 | 0.955 | – | – | – | – | – | 0.030 | 0.088 | <b>0.047</b>           |
|          |    | SSB  | 0.100 | 0.900 | – | – | – | – | – | 0.200 | 0.200 | 1.000                  |
|          |    | FP   | 0.025 | 0.975 | – | – | – | – | – | 0.050 | 0.049 | 1.000                  |
|          | Z  | WSB  | 0.150 | 0.850 | – | – | – | – | – | 0.150 | 0.258 | <b>0.026</b>           |
|          |    | SEED | 0.100 | 0.900 | – | – | – | – | – | 0.200 | 0.182 | 1.000                  |
|          |    | RO   | 0.075 | 0.925 | – | – | – | – | – | 0.150 | 0.141 | 1.000                  |
|          |    | SSB  | 0.174 | 0.826 | – | – | – | – | – | 0.348 | 0.294 | 1.000                  |
|          |    | FP   | 0.113 | 0.888 | – | – | – | – | – | 0.225 | 0.202 | 1.000                  |
|          | S  | WSB  | 0.019 | 0.981 | – | – | – | – | – | 0.038 | 0.038 | 1.000                  |
|          |    | SEED | 0.013 | 0.988 | – | – | – | – | – | 0.025 | 0.025 | 1.000                  |
|          |    | RO   | 0.013 | 0.988 | – | – | – | – | – | 0.025 | 0.025 | 1.000                  |
|          |    | SSB  | 0     | 1     | – | – | – | – | – |       |       |                        |
|          |    | FP   | 0.013 | 0.988 | – | – | – | – | – | 0.025 | 0.025 | 1.000                  |
| 6-Pgdh-1 | DP | WSB  | 0.488 | 0.513 | – | – | – | – | – | 0.975 | 0.506 | <b>10<sup>-4</sup></b> |
|          |    | SEED | 0.500 | 0.500 | – | – | – | – | – | 1.000 | 0.506 | <b>10<sup>-4</sup></b> |
|          |    | RO   | 0.500 | 0.500 | – | – | – | – | – | 1.000 | 0.506 | <b>10<sup>-4</sup></b> |
|          |    | SSB  | 0.500 | 0.500 | – | – | – | – | – | 1.000 | 0.517 | <b>10<sup>-4</sup></b> |
|          |    | FP   | 0.500 | 0.500 | – | – | – | – | – | 1.000 | 0.506 | <b>10<sup>-4</sup></b> |
|          | O  | WSB  | 0.500 | 0.500 | – | – | – | – | – | 1.000 | 0.506 | <b>10<sup>-4</sup></b> |
|          |    | SEED | 0.500 | 0.500 | – | – | – | – | – | 1.000 | 0.506 | <b>10<sup>-4</sup></b> |
|          |    | RO   | 0.500 | 0.500 | – | – | – | – | – | 1.000 | 0.508 | <b>10<sup>-4</sup></b> |
|          |    | SSB  | 0.500 | 0.500 | – | – | – | – | – | 1.000 | 0.556 | 0.127                  |
|          |    | FP   | 0.500 | 0.500 | – | – | – | – | – | 1.000 | 0.506 | <b>10<sup>-4</sup></b> |
|          | Z  | WSB  | 0.488 | 0.513 | – | – | – | – | – | 0.975 | 0.506 | <b>10<sup>-4</sup></b> |
|          |    | SEED | 0.500 | 0.500 | – | – | – | – | – | 1.000 | 0.506 | <b>10<sup>-4</sup></b> |
|          |    | RO   | 0.500 | 0.500 | – | – | – | – | – | 1.000 | 0.506 | <b>10<sup>-4</sup></b> |
|          |    | SSB  | 0.500 | 0.500 | – | – | – | – | – | 1.000 | 0.511 | <b>10<sup>-4</sup></b> |
|          |    | FP   | 0.488 | 0.513 | – | – | – | – | – | 0.975 | 0.506 | <b>10<sup>-4</sup></b> |
|          | S  | WSB  | 0.500 | 0.500 | – | – | – | – | – | 1.000 | 0.510 | <b>10<sup>-4</sup></b> |
|          |    | SEED | 0.500 | 0.500 | – | – | – | – | – | 1.000 | 0.506 | <b>10<sup>-4</sup></b> |

|       |    |      |       |       |       |       |   |   |   |       |       |                        |
|-------|----|------|-------|-------|-------|-------|---|---|---|-------|-------|------------------------|
|       |    | RO   | 0.500 | 0.500 | –     | –     | – | – | – | 1.000 | 0.506 | <b>10<sup>-4</sup></b> |
|       |    | SSB  | 0.500 | 0.500 | –     | –     | – | – | – | 1.000 | 0.571 | 0.314                  |
|       |    | FP   | 0.488 | 0.513 | –     | –     | – | – | – | 0.975 | 0.506 | <b>10<sup>-4</sup></b> |
| Aat-1 | DP | WSB  | 0     | 0.038 | 0.950 | 0.013 | – | – | – | 0.100 | 0.097 | 1.000                  |
|       |    | SEED | 0.013 | 0.013 | 0.938 | 0.038 | – | – | – | 0.125 | 0.121 | 1.000                  |
|       |    | RO   | 0     | 0.013 | 0.975 | 0.013 | – | – | – | 0.050 | 0.050 | 1.000                  |
|       |    | SSB  | 0     | 0     | 1     | 0     | – | – | – |       |       |                        |
|       |    | FP   | 0     | 0.025 | 0.925 | 0.050 | – | – | – | 0.150 | 0.143 | 1.000                  |
|       | O  | WSB  | 0     | 0     | 0.987 | 0.013 | – | – | – | 0.026 | 0.026 | 1.000                  |
|       |    | SEED | 0     | 0     | 1     | 0     | – | – | – |       |       |                        |
|       |    | RO   | 0     | 0     | 1     | 0     | – | – | – |       |       |                        |
|       |    | SSB  | 0     | 0     | 1     | 0     | – | – | – |       |       |                        |
|       |    | FP   | 0     | 0     | 1     | 0     |   | – | – |       |       |                        |
|       | Z  | WSB  | 0     | 0     | 1     | 0     | – | – | – |       |       |                        |
|       |    | SEED | 0     | 0     | 1     | 0     | – | – | – |       |       |                        |
|       |    | RO   | 0     | 0     | 1     | 0     | – | – | – |       |       |                        |
|       |    | SSB  | 0     | 0     | 1     | 0     | – | – | – |       |       |                        |
|       |    | FP   | 0     | 0     | 1     | 0     | – | – | – |       |       |                        |
|       | S  | WSB  | 0.058 | 0.058 | 0.827 | 0.058 | – | – | – | 0.231 | 0.312 | 0.078                  |
|       |    | SEED | 0     | 0.088 | 0.850 | 0.063 | – | – | – | 0.250 | 0.269 | 0.130                  |
|       |    | RO   | 0     | 0.113 | 0.813 | 0.075 | – | – | – | 0.250 | 0.326 | 0.085                  |
|       |    | SSB  | 0     | 0     | 1     | 0     | – | – | – |       |       |                        |
|       |    | FP   | 0     | 0.088 | 0.875 | 0.038 | – | – | – | 0.225 | 0.228 | 0.469                  |
| Aat-2 | DP | WSB  | 0.025 | 0.975 | –     | –     | – | – | – | 0.050 | 0.049 | 1.000                  |
|       |    | SEED | 0.025 | 0.975 | –     | –     | – | – | – | 0.050 | 0.049 | 1.000                  |
|       |    | RO   | 0.013 | 0.988 | –     | –     | – | – | – | 0.025 | 0.025 | 1.000                  |
|       |    | SSB  | 0.100 | 0.900 | –     | –     | – | – | – | 0.200 | 0.186 | 1.000                  |
|       |    | FP   | 0.038 | 0.963 | –     | –     | – | – | – | 0.075 | 0.073 | 1.000                  |
|       | O  | WSB  | 0.050 | 0.950 | –     | –     | – | – | – | 0.050 | 0.096 | 0.075                  |
|       |    | SEED | 0.013 | 0.988 | –     | –     | – | – | – | 0.025 | 0.025 | 1.000                  |

|     |    |      |       |       |       |   |   |   |   |       |       |                        |
|-----|----|------|-------|-------|-------|---|---|---|---|-------|-------|------------------------|
|     |    | RO   | 0.030 | 0.970 | -     | - | - | - | - | 0.061 | 0.060 | 1.000                  |
|     |    | SSB  | 0     | 1     | -     | - | - | - | - |       |       |                        |
|     |    | FP   | 0     | 1     | -     | - | - | - | - |       |       |                        |
|     | Z  | WSB  | 0     | 1     | -     | - | - | - | - |       |       |                        |
|     |    | SEED | 0     | 1     | -     | - | - | - | - |       |       |                        |
|     |    | RO   | 0     | 1     | -     | - | - | - | - |       |       |                        |
|     |    | SSB  | 0     | 1     | -     | - | - | - | - |       |       |                        |
|     |    | FP   | 0     | 1     | -     | - | - | - | - |       |       |                        |
|     | S  | WSB  | 0.019 | 0.981 | -     | - | - | - | - | 0.038 | 0.038 | 1.000                  |
|     |    | SEED | 0.038 | 0.963 | -     | - | - | - | - | 0.075 | 0.073 | 1.000                  |
|     |    | RO   | 0.013 | 0.988 | -     | - | - | - | - | 0.025 | 0.025 | 1.000                  |
|     |    | SSB  | 0.125 | 0.875 | -     | - | - | - | - | 0.250 | 0.250 | 1.000                  |
|     |    | FP   | 0.025 | 0.975 | -     | - | - | - | - | 0.050 | 0.049 | 1.000                  |
| Pgm | DP | WSB  | 0     | 0.713 | 0.288 | - | - | - | - | 0.075 | 0.415 | <b>10<sup>-4</sup></b> |
|     |    | SEED | 0     | 0.850 | 0.150 | - | - | - | - | 0.100 | 0.258 | <b>0.002</b>           |
|     |    | RO   | 0     | 0.888 | 0.113 | - | - | - | - | 0.125 | 0.202 | 0.056                  |
|     |    | SSB  | 0     | 0.967 | 0.033 | - | - | - | - | 0.067 | 0.067 | 1.000                  |
|     |    | FP   | 0     | 0.788 | 0.213 | - | - | - | - | 0.075 | 0.339 | <b>10<sup>-4</sup></b> |
|     | O  | WSB  | 0     | 0.988 | 0.013 | - | - | - | - | 0.025 | 0.025 | 1.000                  |
|     |    | SEED | 0     | 0.950 | 0.050 | - | - | - | - | 0.050 | 0.096 | 0.075                  |
|     |    | RO   | 0.015 | 0.909 | 0.076 | - | - | - | - | 0.061 | 0.170 | <b>0.004</b>           |
|     |    | SSB  | 0     | 0.900 | 0.100 | - | - | - | - | 0.200 | 0.200 | 1.000                  |
|     |    | FP   | 0     | 0.925 | 0.075 | - | - | - | - | 0.100 | 0.141 | 0.182                  |
|     | Z  | WSB  | 0     | 1     | 0     | - | - | - | - |       |       |                        |
|     |    | SEED | 0     | 1     | 0     | - | - | - | - |       |       |                        |
|     |    | RO   | 0     | 1     | 0     | - | - | - | - |       |       |                        |
|     |    | SSB  | 0     | 1     | 0     | - | - | - | - |       |       |                        |
|     |    | FP   | 0     | 1     | 0     | - | - | - | - |       |       |                        |
|     | S  | WSB  | 0     | 0.404 | 0.596 | - | - | - | - | 0.038 | 0.491 | <b>10<sup>-4</sup></b> |
|     |    | SEED | 0     | 0.925 | 0.075 | - | - | - | - | 0.050 | 0.141 | <b>0.007</b>           |

|     |    |      |       |       |       |       |       |   |   |       |       |                        |
|-----|----|------|-------|-------|-------|-------|-------|---|---|-------|-------|------------------------|
|     |    | RO   | 0     | 0.925 | 0.075 | –     | –     | – | – | 0.050 | 0.141 | <b>0.007</b>           |
|     |    | SSB  | 0     | 1     | 0     | –     | –     | – | – |       |       |                        |
|     |    | FP   | 0     | 0.888 | 0.113 | –     | –     | – | – | 0.025 | 0.202 | <b>10<sup>-4</sup></b> |
| Est | DP | WSB  | 0     | 0     | 0.713 | 0.288 | 0     | – | – | 0.375 | 0.415 | 0.699                  |
|     |    | SEED | 0     | 0     | 0.850 | 0.150 | 0     | – | – | 0.100 | 0.258 | <b>0.001</b>           |
|     |    | RO   | 0     | 0     | 0.813 | 0.188 | 0     | – | – | 0.225 | 0.309 | 0.110                  |
|     |    | SSB  | 0     | 0     | 0.867 | 0.133 | 0     | – | – | 0.133 | 0.239 | 0.204                  |
|     |    | FP   | 0.038 | 0.013 | 0.838 | 0.088 | 0.025 | – | – | 0.150 | 0.292 | <b>0.001</b>           |
|     | O  | WSB  | 0     | 0     | 0.950 | 0.050 | 0     | – | – | 0.100 | 0.096 | 1.000                  |
|     |    | SEED | 0     | 0     | 0.950 | 0.050 | 0     | – | – | 0.100 | 0.096 | 1.000                  |
|     |    | RO   | 0     | 0     | 0.833 | 0.167 | 0     | – | – | 0.152 | 0.282 | <b>0.024</b>           |
|     |    | SSB  | 0     | 0     | 1     | 0     | 0     | – | – |       |       |                        |
|     |    | FP   | 0.038 | 0.013 | 0.863 | 0.088 | 0     | – | – | 0.250 | 0.250 | 0.231                  |
|     | Z  | WSB  | 0     | 0.025 | 0.888 | 0.088 | 0     | – | – | 0.200 | 0.207 | 0.199                  |
|     |    | SEED | 0     | 0.025 | 0.875 | 0.100 | 0     | – | – | 0.100 | 0.227 | <b>0.001</b>           |
|     |    | RO   | 0     | 0.088 | 0.813 | 0.075 | 0.025 | – | – | 0.175 | 0.330 | <b>0.001</b>           |
|     |    | SSB  | 0     | 0.022 | 0.891 | 0.087 | 0     | – | – | 0.217 | 0.202 | 1.000                  |
|     |    | FP   | 0     | 0.025 | 0.788 | 0.188 | 0     | – | – | 0.200 | 0.348 | <b>0.010</b>           |
|     | S  | WSB  | 0     | 0     | 0.673 | 0.327 | 0     | – | – | 0.500 | 0.449 | 0.671                  |
|     |    | SEED | 0     | 0     | 0.800 | 0.163 | 0.038 | – | – | 0.350 | 0.336 | 1.000                  |
|     |    | RO   | 0     | 0     | 0.913 | 0.075 | 0.013 | – | – | 0.125 | 0.164 | 0.251                  |
|     |    | SSB  | 0     | 0     | 1     | 0     | 0     | – | – |       |       |                        |
|     |    | FP   | 0     | 0     | 0.850 | 0.150 | 0     | – | – | 0.250 | 0.258 | 1.000                  |
